# Supplementary material
Source: Springer Nature journal article supplement (https://www.springermedizin.de/resource/supplementary/13012_2011_383_MOESM1_ESM.pdf/9629900)

- F6
- F31
- F39
- F41

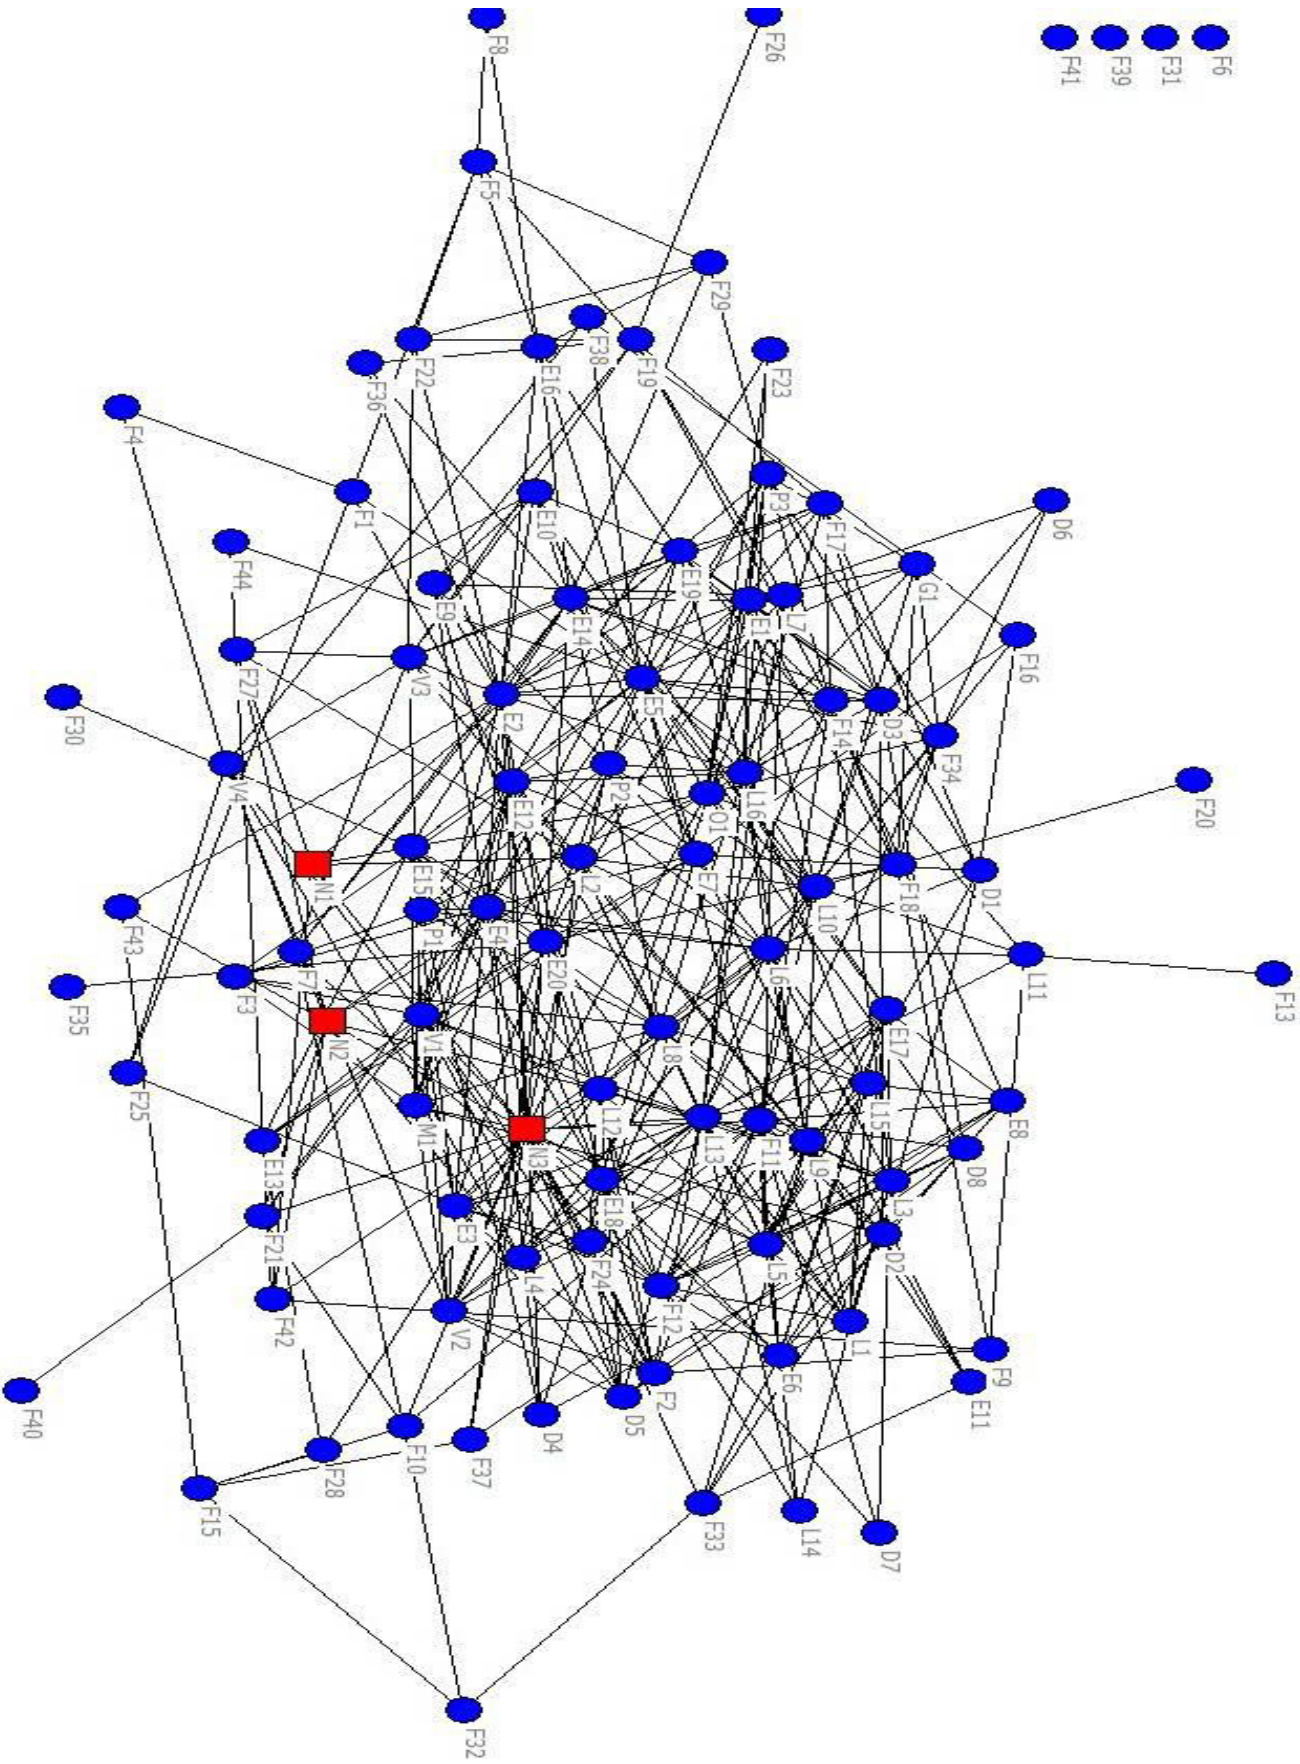

Supplement: MOESM1 [file 9629900]
